1                   **Inflated citations and metrics of journals**  
2                   **discontinued from Scopus for publication concerns:**  
3                   **the GhoS(t)copus Project**

4                   Andrea Cortegiani<sup>a\*</sup>, Mariachiara Ippolito<sup>a</sup>, Giulia Ingoglia<sup>a</sup>, Andrea Manca<sup>b</sup>, Lucia  
5                   Cugusi<sup>b</sup>, Anna Severin<sup>c,g</sup>, Michaela Strinzel<sup>c</sup>, Vera Panzarella<sup>d</sup>, Giuseppina  
6                   Campisi<sup>d</sup>, Lalu Manoj<sup>e</sup>, Cesare Gregoretti<sup>a</sup>, Sharon Einav<sup>f</sup>,  
7                   David Moher<sup>e</sup> and Antonino Giarratano<sup>a</sup>

8  
9                   <sup>a</sup>*Department of Surgical, Oncological and Oral Science (Di.Chir.On.S). Section of*  
10                   *Anaesthesia, Analgesia, Intensive Care and Emergency. Policlinico Paolo Giaccone.*  
11                   *University of Palermo, via del Vespro 129, 90127, Palermo, Italy.*

12                   <sup>b</sup>*Department of Biomedical Sciences, University of Sassari, viale S. Pietro 07100,*  
13                   *Sassari, Italy*

14                   <sup>c</sup>*Swiss National Science Foundation, Wildhainweg 3P.O. Box CH-3001 Bern, Swit-*  
15                   *zerland*

16                   <sup>d</sup>*Department of Surgical, Oncological and Oral Science (Di.Chir.On.S), Section of*  
17                   *Oral Medicine, University of Palermo, via del Vespro 129, 90127, Palermo, Italy*

18                   <sup>e</sup>*Centre for Journalology, Clinical Epidemiology Program, Ottawa Hospital Research*  
19                   *Institute; School of Epidemiology and Public Health, University of Ottawa, 501 Smyth*  
20                   *Road, PO BOX 201B, Ottawa, Ontario, Canada.*

21                   <sup>f</sup>*Intensive Care Unit of the Shaare Zedek Medical Medical Centre and Hebrew Uni-*  
22                   *versity Faculty of Medicine, 12 Beyt St, Jerusalem, Israel*

23                   <sup>g</sup>*Institute for Social and Preventive Medicine, Mittelstrasse 43, 3012, Bern, Switzer-*  
24                   *land*

25  
26                   \* **Corresponding author:** Andrea Cortegiani. Department of Surgical, Oncological  
27                   and Oral Science (Di.Chir.On.S). Section of Anaesthesia, Analgesia, Intensive Care

28 and Emergency. Policlinico Paolo Giaccone, University of Palermo, via del Vespro  
29 129, 90127, Palermo, Italy. Email: [andrea.cortegiani@unipa.it](mailto:andrea.cortegiani@unipa.it); Phone: +39  
30 0916552700

31

32 **Keywords:** predatory; journal; Scopus; metrics; indexing; citation count

33 **Word count: 2491**

## 34 **Abstract**

35 **Background:** Scopus is a leading bibliometric database. It contains the largest  
36 number of articles cited in peer-reviewed publications. The journals included in Sco-  
37 pus are periodically re-evaluated to ensure they meet indexing criteria and some  
38 journals might be discontinued for publication concerns. These journals remain in-  
39 dexed and can be cited. Their metrics have yet to be studied. This study aimed to  
40 evaluate the main features and metrics of journals discontinued from Scopus for  
41 publication concerns, before and after their discontinuation, and to determine the ex-  
42 tent of predatory journals among the discontinued journals.

43 **Methods:** We surveyed the list of discontinued journals from Scopus (July 2019).  
44 Data regarding metrics, citations and indexing were extracted from Scopus or other  
45 scientific databases, for the journals discontinued for publication concerns.

46 **Results:** A total of 317 journals were evaluated. Ninety-three percent of the journals  
47 (294/318) declared they published using an Open Access model. The subject areas  
48 with the greatest number of discontinued journals were *Medicine* (52/317; 16%), *Ag-*  
49 *riculture and Biological Science* (34/317; 11%), and *Pharmacology, Toxicology and*  
50 *Pharmaceutics* (31/317; 10%). The mean number of citations per year after discon-  
51 tinuation was significantly higher than before (median of difference 64 citations,  
52  $p < 0.0001$ ), and so was the number of citations per document (median of difference

53 0.4 citations,  $p < 0.0001$ ). Twenty-two percent (72/317) were included in the Cabell's  
54 blacklist. The DOAJ currently included only 9 journals while 61 were previously in-  
55 cluded and discontinued, most for "suspected editorial misconduct by the publisher".

56 **Conclusions:** The citation count of journals discontinued for publication concerns  
57 increases despite discontinuation and predatory behaviors seemed common. This  
58 paradoxical trend can inflate scholars' metrics prompting artificial career advance-  
59 ments, bonus systems and promotion. Countermeasures should be taken urgently to  
60 ensure the reliability of Scopus metrics both at the journal- and author-level for the  
61 purpose of scientific assessment of scholarly publishing.

62

## 63 **Introduction**

64 Scopus is a leading bibliometric database launched in 2004 by the publishing  
65 and analytics company Elsevier. It was developed by research institutions, research-  
66 ers and librarians, and contains the largest number of abstracts and articles cited in  
67 peer reviewed academic journal articles that cover scientific, technical, medical, and  
68 social science fields.[1]

69 Scopus provides bibliometric indicators that many institutions use to rank journals to  
70 evaluate the track record of scholars who seek hiring or promotion. These metrics  
71 are also used to allocate financial bonuses or to evaluate funding applications.  
72 [2,3,4] Ensuring the quality of the content of the Scopus database is, therefore, of  
73 great importance.

74 To be indexed in Scopus, journals are evaluated and periodically reviewed by an in-  
75 dependent and international Content Selection and Advisory Board (CSAB), which is  
76 a group of scientists, researchers and librarians, comprised of 17 Subject Chairs,

77 each representing a specific subject field, and by a computerized algorithm. [1] At  
78 any time after a journal inclusion, concerns regarding its quality may be raised by a  
79 formal complaint, thereby flagging the journal for re-evaluation by the CSAB. Should  
80 the CSAB panel determine that the journal no longer meets Scopus standards, new  
81 articles from that journal are no longer be indexed. [1] One of the most common rea-  
82 sons for discontinuation is ‘publication concerns’, which refers to the quality of edito-  
83 rial practices or other issues that have an impact on its suitability for continued cov-  
84 erage. [5] The list of the discontinued sources is publicly available and is updated  
85 approximately every six months. [6] However, publications from no longer indexed  
86 journals may not be removed retrospectively from Scopus. Hence, articles indexed  
87 prior to the date of discontinuation could remain part of the database. [7]

88 It has been claimed that a number of journals discontinued from Scopus for publica-  
89 tion concerns might be so-called ‘predatory’ journals. [6,7,8] Predatory journals “pri-  
90 oritize self-interest at the expense of scholarship and are characterized by false or  
91 misleading information, deviation from best editorial and publication practices, a lack  
92 of transparency, and/or the use of aggressive and indiscriminate solicitation practic-  
93 es”. [9] Since researchers are pressured to publish in indexed journals, predatory  
94 journals are constantly trying to be indexed in the Scopus database, thereby boost-  
95 ing their attractiveness to researchers. [2,7,8,10] Having articles from predatory jour-  
96 nals indexed in Scopus poses a threat to the credibility of science and might cause  
97 harm particularly in fields where practitioners rely on empirical evidence in the form  
98 of indexed journal articles. [10,11]

99         We hypothesize that, even though Scopus coverage is halted for discontinued  
100 journals, still they can get citations, as all their documents already indexed remain  
101 available to users. To date, the metrics of those journals discontinued for publication

102 concerns have not been studied yet. Therefore, by the present analysis we set out to  
103 (1) evaluate the main scientific features and citation metrics of journals discontinued  
104 from Scopus for publication concerns, before and after discontinuation, and (2) de-  
105 termine the extent of predatory journals included in the discontinued journals.

106

## 107 **Methods**

### 108 ***Search strategy***

109 The freely accessible and regularly updated Elsevier list [1] of journals discon-  
110 tinued from the Scopus database (version July 2019) [12] was accessed on 24<sup>th</sup>  
111 January 2020 (See **S1 Appendix**). We restricted our analysis to journals disconti-  
112 ued for “publication concerns”. Journals were checked for relevant data (described  
113 below), then independently collected by eight of the authors in pairs (MI, GI, AM, LC,  
114 AS, MS, VP, AC) using a standardized data extraction form. A second check was  
115 performed by other four authors (LM, CG, SE, AG) to confirm the data and resolve  
116 discrepancies. Data collection was initiated on 24<sup>th</sup> January and completed by the  
117 end of February 2020. Confirmed data were registered on an Excel datasheet (**S2**  
118 **Appendix**).

### 119 ***Retrieved data and sources***

120 Data were extracted either from the Scopus database [12] or by searching  
121 other sources, such as SCImago Journal & Country Rank (SJCR), [13] Journal Cita-  
122 tion Reports, Centre for Science and Technology Studies (CWTS) Journal Indicators,  
123 [14] Beall’s updated List, [15] Directory of Open Access Journals (DOAJ), [16] Pub-  
124 Med [17] and Web of Science. [18] Open Access policy was checked directly on  
125 journals websites. A standardized data extraction form, independently applied by

126 eight authors (MI, GI, AM, LC, AS, MS, VP, AC), was used to collect the following  
127 data: journal title, name and country of the publisher, the number of years of Scopus  
128 coverage, year of Scopus discontinuation, subject areas and sub-subject areas, Im-  
129 pact Factor (IF), CiteScore, SCImago Journal Rank (SJR), Source Normalized Im-  
130 pact *per Paper* (SNIP), best SCImago quartile, inclusion in PubMed, Web Of Science  
131 (WOS) and DOAJ (for open access journals) databases, presence in the updated  
132 Beall's List, total number of published documents and total number of citations. All  
133 the metrics were checked on the year of Scopus discontinuation. In cases of dis-  
134 crepancies between Scopus data and other sources, the Scopus database was used  
135 as the preferential source.

136 We defined the 'before discontinuation' time frame as the period comprised within  
137 the first year of journal coverage by Scopus and the year of discontinuation, which  
138 was not included in our calculations. By 'after discontinuation' time frame, we re-  
139 ferred to the period comprised within the year of Scopus discontinuation and the year  
140 of our data collection. In cases of multiple discontinuations, we considered only the  
141 last one, according to the date of the last document displayed in the Scopus data-  
142 base. Citations 'before' and 'after' the date of discontinuation were manually counted  
143 based on either the Scopus journal overview or the downloadable tables made avail-  
144 able by Scopus upon request. When evaluating the journal inclusion in PubMed,  
145 WOS and DOAJ, year 2019 was considered as the reference year, thus preventing  
146 any disadvantage for journals with a time gap for publication.

147 Finally, one author (AS) checked whether discontinued journals were present  
148 in Cabell's whitelist or blacklist [19] or the DOAJ's list of discontinued journals. [20]  
149 As some of the journals included in the blacklist lack ISSNs or other unique identifi-  
150 ers, the comparison of the three lists with Scopus's discontinued journals was based

151 on matching the journals' names by similarity using the Jaro-Winkler algorithm in R  
152 package RecordLinkage, following the approach developed by Strinzel et al. (2019).  
153 [21,22] The Jaro-Winkler metric, scaled between 0 (no similarity) and 1 (exact  
154 match), was calculated for all possible journals' pairings. [23] We manually inspected  
155 all pairs with a Jaro-Winkler metric smaller than one in order to include cases where,  
156 due to the orthographical differences between the lists, no exact match was found.  
157 For each matched pair, we compared the journals' publishers and, where possible,  
158 ISSNs, to exclude any cases where two journals had the same or a similar name but  
159 were edited by different publishers.

160 Full definitions and descriptions of the sources and metrics are reported in the **S3**  
161 **Appendix.**

### 162 ***Statistical analysis***

163 All data management and calculations were performed using Microsoft Excel (ver-  
164 sion 2013, Microsoft Corporation®, USA) and GraphPad Prism (version 8.3.1, 322,  
165 GraphPad software®, San Diego California). The normality of the distribution was  
166 assessed with the D'Agostino-Pearson test. Means and standard deviations (SDs)  
167 for variables with a normal distribution or medians, interquartile ranges (IQRs, 25th–  
168 75th) and ranges (minimum value - maximum value) for non-normally distributed da-  
169 ta were calculated and reported. Categorical data were expressed as proportions  
170 and percentages.

171 The paired sample *t* test or the Wilcoxon matched-pairs signed ranked test were  
172 used to compare journals' data before and after Scopus discontinuation, as appro-  
173 priate.

174

## 175 **Results**

176 Data could be retrieved regarding 317 of the 348 journals listed as discontinued  
177 (91.1%).

### 178 ***Journals' and publishers' characteristics***

179 Among the 135 publishers identified, the publishers with the largest number of  
180 discontinued journals were: *Academic Journals Inc.* (39/317; 12.3%), *Asian Network*  
181 *for Scientific Information* (19/317; 6.0%), and *OMICS Publishing Group* (18/317;  
182 5.7%). **S1 Table** reports the distribution of Scopus discontinued journals by publish-  
183 er. United States (76/317, 24%), India (63/317, 20%) and Pakistan (49/317, 15%)  
184 were the most common countries where publishers declared they were headquar-  
185 tered (**S1 Fig.** and **S2 Table**).

186 The subject areas with the greatest number of discontinued journals were  
187 *Medicine* (52/317; 16%), *Agriculture and Biological Science* (34/317; 11%), and  
188 *Pharmacology, Toxicology and Pharmaceutics* (31/317; 10%) **S3 Table** and **S4 Ta-**  
189 **ble** report the distribution of discontinued journals by subject area and sub-area in  
190 full. Ninety-three percent of the journals (294/318) declared they published using an  
191 Open Access model.

192 **Table 1** shows the characteristics and metrics of journals at the time of dis-  
193 continuation. The median time of Scopus coverage prior to discontinuation of the  
194 journals was 8 years (IQR 6-10, range 1-54). Two hundred ninety-nine journals had  
195 been assigned to a SCImago quartile (Q); 39 of them (13%) listed in Q1 or Q2, and  
196 260 in Q3 or Q4 (87%). Only ten of the discontinued journals had an Impact Factor  
197 at the year of discontinuation, with a median value of 0.84 (IQR 0.37-2.29, range  
198 0.28-4).

### 199 ***Citation metrics***



200           **Table 2** shows the total number of documents and citations, the total number  
201 of documents per journal and the citations count before and after Scopus discontinu-  
202 ation. The total number of citations received after discontinuation was 607,261, with  
203 a median of 713 citations (IQR 254-2,056, range 0-19,468) per journal.

204           Paired *t*-tests revealed that the mean number of citations per year after dis-  
205 continuation was significantly higher than before (median of difference 64 citations,  
206  $p < 0.0001$ ). Likewise, the number of citations per document proved significantly high-  
207 er after discontinuation (median of difference 0.4 citations,  $p < 0.0001$ ) (Table 2).

### 208 ***Indexing in Cabell's lists, updated Beall's list, DOAJ and scientific databases***

209           Twenty-two percent (72/317) of the journals were included in the Cabell's  
210 blacklist, while 29 (9%) were currently under review for inclusion. Only five journals  
211 (2%) were included in the Cabell's whitelist. In 243 cases (243/317), either the  
212 journal's publisher was included in the updated Beall's list of predatory publishers or  
213 the journal was included in the corresponding list of standalone journals (76.6%).  
214 The DOAJ currently includes only 9 journals. Sixty-one journals were previously in-  
215 cluded and discontinued by DOAJ; in 36 cases the reason was 'suspected editorial  
216 misconduct by the publisher' while in 23 instances it was 'journal not adhering to best  
217 practice' and in one case 'no open access or license info'.

218           **Table 3** shows the indexing in PubMed and Web of Science.

219

## 220 **Discussion**

221           The present study was aimed at scrutinizing the main features of journals  
222 whose coverage was discontinued by Scopus due to publication concerns. To do so,  
223 (a) we counted and compared citation metrics per journal and per document ob-

224 tained *before* and *after* discontinuation, and (b) accessed well-known and estab-  
225 lished blacklists and whitelists dealing with the issue of predatory publishing, i.e. Ca-  
226 bell's and updated Beall's list, as well as the DOAJ.

227 Our main finding was that articles published in these journals before discontinuation,  
228 remain available to users and continue to receive a relevant number of citations after  
229 discontinuation, more than before. Moreover, a large number of the discontinued  
230 journals are likely to be predatory.

231 Although Scopus applies a rigorous control of content quality and warns users  
232 when a journal is discontinued in its source details, the average users tend not to ac-  
233 cess journal's details but articles' contents. By doing so, they remain unaware that  
234 the article they have accessed was issued by a journal discontinued for publication  
235 concerns. As a consequence, articles issued by journals whose scientific reputation  
236 is currently deemed questionable, continue to be displayed and to get cited as con-  
237 tents from legitimate, up-to-standard journals. When quantifying how coverage dis-  
238 continuation affected the likelihood of these journals to be cited, data indicate that  
239 their articles received significantly more citations after discontinuation than before.

240 Beyond the dangerous exposure of scholars, clinicians and even patients to  
241 potentially dubious or low quality contents, the considerable number of citations re-  
242 ceived after discontinuation by "ghost journals" can be a serious threat to scientific  
243 quality assessment by institutions and academia. In fact, these citations contribute to  
244 the calculation of the authors' metrics by Scopus, including the Hirsch index (H-  
245 index), [24] which is still among the main descriptors of productivity and scientific im-  
246 pact, based on career advancements are determined. [2,3,4] The fact that "ghost  
247 journals" can help to move up in academia is a relevant issue, and has inspired the

248 allegorical vignette depicted in **Fig. 1**: ghost journals can inflate authors' metrics lift-  
249 ing them unnaturally and effortlessly.

250         Of greatest concern is our finding that many of the discontinued journals dis-  
251 play predatory behaviors in claiming to be open access. Exploitation of the open-  
252 access publishing model has been shown to go hand in hand with deviation from  
253 best editorial and publication practices for self-interest. [9] Such journals are not only  
254 associated with poor editorial quality, but are also deceptive and misleading by na-  
255 ture, i.e. they prioritize self-interest at the expense of scholars, and lack transparent  
256 and independent peer review. [9,25] Young researchers from low-income and mid-  
257 dle-income countries are probably most susceptible to the false promises and detri-  
258 mental practices of predatory journals. However, "predatory scholars" also seem to  
259 exist, possibly sharing a common interest with deceptive journals and publishers and  
260 knowingly using them to achieve their own ends. [7,26,27]

261         The policy underlying the decision to keep publications prior to discontinuation  
262 of indexing is clear. Some of these publications may actually fulfill publishing criteria  
263 (e.g. International Committee of Medical Journal Editors, Committee on Publication  
264 Ethics). It would be unfair to punish researchers for an eventual deterioration in jour-  
265 nal performance; changes in the standards employed by the journal may change  
266 over time and the researchers may be unaware of quality issues. On the other hand,  
267 as the integrity of the editorial process cannot be vouched for, it is ethically untena-  
268 ble to keep such data available without clearer warnings.

269         We believe that Scopus should evaluate deleting the discontinued journals  
270 from the database contents or, at least, stop tracking their citations. In alternative, we  
271 propose that the CSAB could apply these measures case-by-case, after evaluating  
272 the severity of the potential misconducts. At the author-level, an alternative may be

273 the provision of two metrics: one with and one without citations from publications in  
274 discontinued journals.

275 This analysis is not free of limitations. First, we included the year of discontin-  
276 uation in the “*after discontinuation*” period, starting from January 1<sup>th</sup>. This decision  
277 may have led to some overestimation in the number of citations received after dis-  
278 continuation. Second, we included only those journals discontinued from Scopus for  
279 “publication concerns” but were not able to retrieve details regarding the specific  
280 concern raised. Finally, we did not evaluate the impact of the citations received after  
281 discontinuation on author-level metrics.

## 282 **Conclusions**

283 The citation count of journals whose coverage in Scopus has been halted for  
284 publication concerns, increases despite discontinuation. This paradoxical trend can  
285 inflate scholars’ metrics prompting career advancements and promotions. Counter-  
286 measures should be taken to ensure the validity and reliability of Scopus metrics  
287 both at journals- and author-level for the purpose of scientific assessment of scholar-  
288 ly publishing. Creative thinking is required to resolve this issue without punishing au-  
289 thors who have inadvertently published good quality papers in a failing or predatory  
290 journal.

291

## 292 **Acknowledgments**

293 We would like to thank Dr. Antonio Corrado (“Korrado 20”) for creating and providing  
294 the **Fig. 1**.

295

## 296 **References**

- 297 [ 1 ] Elsevier. How Scopus works.  
298 <https://www.elsevier.com/solutions/scopus/how-scopus-works> [accessed  
299 28 February 2020]
- 300 [ 2 ] Cortegiani A, Manca A, Lalu M, Moher D. Inclusion of predatory jour-  
301 nals in Scopus is inflating scholars' metrics and advancing careers. *Int J*  
302 *Public Health*. 2020;65:3-4 <https://doi.org/10.1007/s00038-019-01318-w>
- 303 [ 3 ] Bagues M, Sylos-Labini M, Zinovyeva N. A walk on the wild side:  
304 "Predatory" journals and information asymmetries in scientific evaluations.  
305 *Research Policy*. 2019;48:462-477  
306 <https://doi.org/10.1016/j.respol.2018.04.013>
- 307 [ 4 ] Hedding DW. Payouts push professors towards predatory journals. *Na-*  
308 *nure*. 2019;565:267 <https://doi.org/10.1038/d41586-019-00120-1>
- 309 [ 5 ] Holland K, Brimblecombe P, Meester W, Steiginga S. The importance  
310 of high-quality content: curation and re-evaluation in Scopus. *Jun.*  
311 [https://www.elsevier.com/\\_data/a-](https://www.elsevier.com/_data/assets/pdf_file/0004/891058/ACAD_LIB_SC_ART_Importance-of-high-quality-content_WEB.pdf)  
312 [sets/pdf\\_file/0004/891058/ACAD\\_LIB\\_SC\\_ART\\_Importance-of-high-](https://www.elsevier.com/_data/assets/pdf_file/0004/891058/ACAD_LIB_SC_ART_Importance-of-high-quality-content_WEB.pdf)  
313 [quality-content\\_WEB.pdf](https://www.elsevier.com/_data/assets/pdf_file/0004/891058/ACAD_LIB_SC_ART_Importance-of-high-quality-content_WEB.pdf) 2019; [accessed 28 February 2020]
- 314 [ 6 ] Elsevier. Content Policy and Selection.  
315 [https://www.elsevier.com/solutions/scopus/how-scopus-](https://www.elsevier.com/solutions/scopus/how-scopus-works/content/content-policy-and-selection)  
316 [works/content/content-policy-and-selection](https://www.elsevier.com/solutions/scopus/how-scopus-works/content/content-policy-and-selection) [accessed 28 February 2020]
- 317 [ 7 ] Cortegiani A, Manca A, Giarratano A. Predatory journals and confer-  
318 ences: why fake counts. *Curr Opin Anaesthesiol*. 2020;33:192–197  
319 <https://doi.org/10.1097/ACO.0000000000000829>
- 320 [ 8 ] Cortegiani A, Misseri G, Gregoretti C, Einav S, Giarratano A. The chal-  
321 lenge of the predatory open-access publishing outbreak. *Eur J*  
322 *Anaesthesiol*. 2019;36:810–813  
323 <https://doi.org/10.1097/EJA.0000000000001083>
- 324 [ 9 ] Grudniewicz A, Moher D, Cobey KD, Bryson GL, Cukier S, Allen K et  
325 al. Predatory journals: no definition, no defence. *Nature*. 2019;576:210-  
326 212 <https://doi.org/10.1038/d41586-019-03759-y>

- 327 [ 10 ] Cortegiani A, Longhini F, Sanfilippo F, Raineri SM, Gregoretti C,  
328 Giarratano A. Predatory Open-Access Publishing in Anesthesiology.  
329 Anesth Analg. 2019;128:182-187 [https://doi.org/  
330 10.1213/ANE.0000000000003803](https://doi.org/10.1213/ANE.0000000000003803)
- 331 [ 11 ] Severin A, Low N. Readers beware! Predatory journals are infiltrating  
332 citation databases. Int J Public Health. 2019;64:1123–1124  
333 <https://doi.org/10.1007/s00038-019-01284-3>
- 334 [ 12 ] Elsevier. Scopus®, registered trademark of Elsevier B.V.  
335 <https://www.scopus.com/home.uri> [accessed 28 February 2020]
- 336 [ 13 ] Scimago Lab, Copyright 2007-2020. <https://www.scimagojr.com> [ac-  
337 cessed 28 February 2020]
- 338 [ 14 ] Centre for Science and Technology Studies. About CWTS. Leiden Uni-  
339 versity, The Netherlands. <https://www.cwts.nl/about-cwts>. [accessed 28  
340 February 2020]
- 341 [ 15 ] Beall's list of predatory journals and publishers. <https://beallslist.net>;  
342 [accessed 28 February 2020]
- 343 [ 16 ] Directory of Open Access Journals. Licensed under CC BY-SA.  
344 <https://doaj.org> [accessed 28 February 2020]
- 345 [ 17 ] PubMed Help [Internet]. Bethesda (MD): National Center for Biotech-  
346 nology Information (US); 2005-. PubMed Help. [Updated 2019 Jul 25].  
347 <https://www.ncbi.nlm.nih.gov/books/NBK3827/> [accessed 28 February  
348 2020]
- 349 [ 18 ] Clarivate Analytics Company.  
350 <https://clarivate.com/webofsciencegroup/solutions/we-of-science/> [ac-  
351 cessed 28 February 2020]
- 352 [ 19 ] Cabell's Scholarly Analytics. <https://www2.cabells.com> [accessed 28  
353 February 2020]
- 354 [ 20 ] Directory of Open Access Journals. DOAJ publishes lists of journals  
355 removed and added. Directory of Open Access Journals Blog.

- 356 <https://blog.doaj.org/2014/05/22/doaj-publishes-lists-of-journals-removed->  
357 [and-added/](https://blog.doaj.org/2014/05/22/doaj-publishes-lists-of-journals-removed-) [accessed 28 February 2020]
- 358 [ 21 ] Strinzel M, Severin A, Milzow K, Egger M. Blacklists and Whitelists To  
359 Tackle Predatory Publishing: a Cross-Sectional Comparison and Thematic  
360 Analysis. Wolf JM, editor. mBio. 2019;10:e00411–19  
361 <https://doi.org/10.1128/mBio.00411-19>
- 362 [ 22 ] Winkler WE. String Comparator Metrics and Enhanced Decision Rules  
363 in the Fellegi-Sunter Model of Record Linkage. ERIC. 1990
- 364 [ 23 ] Porter EH, Winkler WE. Approximate string comparison and its effect  
365 on an advanced record linkage system. Citeseer. 1997
- 366 [ 24 ] Hirsch JE. An index to quantify an individual's scientific research out-  
367 put. Proc Natl Acad Sci U.S.A. 2015;102:16569-16572 [https://doi.org/](https://doi.org/10.1073/pnas.0507655102)  
368 [10.1073/pnas.0507655102](https://doi.org/10.1073/pnas.0507655102)
- 369 [ 25 ] Butterworth JF 4th, Vetter TR. Predatory Journals Undermine Peer Re-  
370 view and Cheapen Scholarship. Anesth Analg. 2019;128:11–12  
371 [https://doi.org/ 10.1213/ANE.0000000000003862](https://doi.org/10.1213/ANE.0000000000003862)
- 372 [ 26 ] Cobey KD, Grudniewicz A, Lalu MM, Rice DB, Raffoul H, Moher D.  
373 Knowledge and motivations of researchers publishing in presumed preda-  
374 tory journals: a survey. BMJ Open. 2019;9:e026516 [https://doi.org/](https://doi.org/10.1136/bmjopen-2018-026516)  
375 [10.1136/bmjopen-2018-026516](https://doi.org/10.1136/bmjopen-2018-026516)
- 376 [ 27 ] Pond BB, Brown SD, Stewart DW, Roane DS, Harirforoosh S. Faculty  
377 Applicants' Attempt to Inflate CVs Using Predatory Journals. Am J Pharm  
378 Educ. 2019;83:7210 [https://doi.org/ 10.5688/ajpe7210](https://doi.org/10.5688/ajpe7210)

379  
380

## 381 **Competing interests**

382 No competing interests were disclosed.

383

## 384 **Figure Legend**

385 **Figure 1. Ghost journals can inflate authors' metrics lifting them unnaturally and effortlessly**

386

## 387 **Tables**

388 **Table 1. Journals characteristics at the year of Scopus discontinuation.**

389

|                                                  |                             |
|--------------------------------------------------|-----------------------------|
| <b>Scopus coverage (yrs.)</b> *                  | 8 [6-10] (1-54)             |
| <b>Time from Scopus discontinuation (yrs.)</b> * | 5 [4-6] (2-12)              |
| <b>Impact Factor</b> †                           | 0.84 [0.37-2.29] (0.28-4)   |
| <b>SjR</b> ‡                                     | 0.17 [0.13-0.23] (0.1-1.41) |
| <b>SNIP</b> §                                    | 0.4 [0.23-0.65] (0-4.56)    |
| <b>CiteScore</b> °                               | 0.32 [0.17-0.46] (0-10.33)  |
| <b>SCImago Quartile</b>                          |                             |
| <b>Q1 (% , n)</b>                                | 3.3 (10/299)                |
| <b>Q2 (% , n)</b>                                | 9.7 (29/299)                |
| <b>Q3 (% , n)</b>                                | 40.8 (122/299)              |
| <b>Q4 (% , n)</b>                                | 46.1 (138/299)              |

390

391 Data are reported as medians, interquartile ranges [IQRs] and ranges (minimum value – maximum value) or as percentages and fractions.

392 \* No missing data. The analyses were conducted on all the 317 Scopus discontinued  
393 journals.

394 † Data were available and calculated for 10 journals.

395 ‡ Data were available and calculated for 304 journals.

396 § Data were available and calculated for 299 journals.

397



398 ° Data were available and calculated for 82 journals.  
 399 SJR: SCImago Journal & Country Rank; SNIP: Source Normalized Impact *per* Paper;  
 400 IF: Impact Factor  
 401

402 **Table 2. Citations and documents before and after Scopus discontinuation.**

|                                       |                                          |                                         |
|---------------------------------------|------------------------------------------|-----------------------------------------|
| <b>Total number of documents</b>      | 591968                                   |                                         |
| <b>Total number of citations</b>      | 1191885                                  |                                         |
| <b>Documents <i>per</i> journal*</b>  | 429 [159.5-1244] (2-132482)              |                                         |
|                                       | <b>Before Scopus<br/>discontinuation</b> | <b>After Scopus<br/>discontinuation</b> |
| <b>Citations (n)</b>                  | 584624                                   | 607621                                  |
| <b>Citations <i>per</i> journal*</b>  | 415 [120-1580] (0-67529)                 | 713 [254-2056] (0-19468)                |
| <b>Citations <i>per</i> year*</b>     | 60.32 [17.98-168] (0-4828)               | 152.9 [49.43-408] (0-4571)              |
| <b>Citations <i>per</i> document*</b> | 1 [0.39-2.15] (0-170.4)                  | 1.66 [0.93-2.66] (0-80.70)              |

403

404 Data are reported as medians, interquartile ranges [IQRs] and ranges (minimum val-  
 405 ue – maximum value), if not otherwise specified.

406 \* No missing data. The analyses were conducted on all the 317 Scopus discontinued  
 407 journals.

408

409

410 **Table 3. Discontinued journals current Open Access policy and main data-**  
 411 **bases indexing.**

|                                     |                |
|-------------------------------------|----------------|
| <b>Open Access journals (% , n)</b> | 92.7 (294/317) |
| <b>PubMed (% , n)</b>               | 6.3 (20/317)   |
| <b>Web Of Science (% , n)</b>       | 9.1 (29/317)   |
| <b>Beall's List (% , n)</b>         | 76.6 (243/317) |
| <b>Cabell's Blacklist (% , n)</b>   | 22.7 (72/317)  |
| <b>Cabell's Whitelist (% , n)</b>   | 1.6 (5/317)    |

**DOAJ included (% , n)** 2.8 (9/317)

**DOAJ discontinued (% , n)** 19.2 (61/317)

412

413 Data are reported as percentages and fractions.

414 DOAJ: Directory of Open Access Journals

415

## 416 **Author contributions**

417 **Conceptualization:** Andrea Cortegiani

418 **Data Curation:** Andrea Cortegiani, Mariachiara Ippolito, Giulia Ingoglia, Andrea

419 Manca, Lucia Cugusi, Anna Severin, Martina Strinzel, Vera Panzarella

420 **Formal Analysis:** Andrea Cortegiani, Mariachiara Ippolito, Giulia Ingoglia

421 **Supervision:** Giuseppina Campisi, Lalu Manoj, Cesare Gregoretti, Sharon Einav,

422 David Moher and Antonino Giarratano

423 **Writing – Original Draft Preparation:** Andrea Cortegiani, Mariachiara Ippolito,

424 Giulia Ingoglia, Andrea Manca, Lucia Cugusi, Anna Severin, Martina Strinzel,

425 **Writing – Review & Editing:** Andrea Cortegiani, Mariachiara Ippolito, Giulia

426 Ingoglia, Andrea Manca, Lucia Cugusi, Anna Severin, Martina Strinzel, Vera

427 Panzarella, Giuseppina Campisi, Lalu Manoj, Cesare Gregoretti, Sharon Einav,

428 David Moher and Antonino Giarratano

429

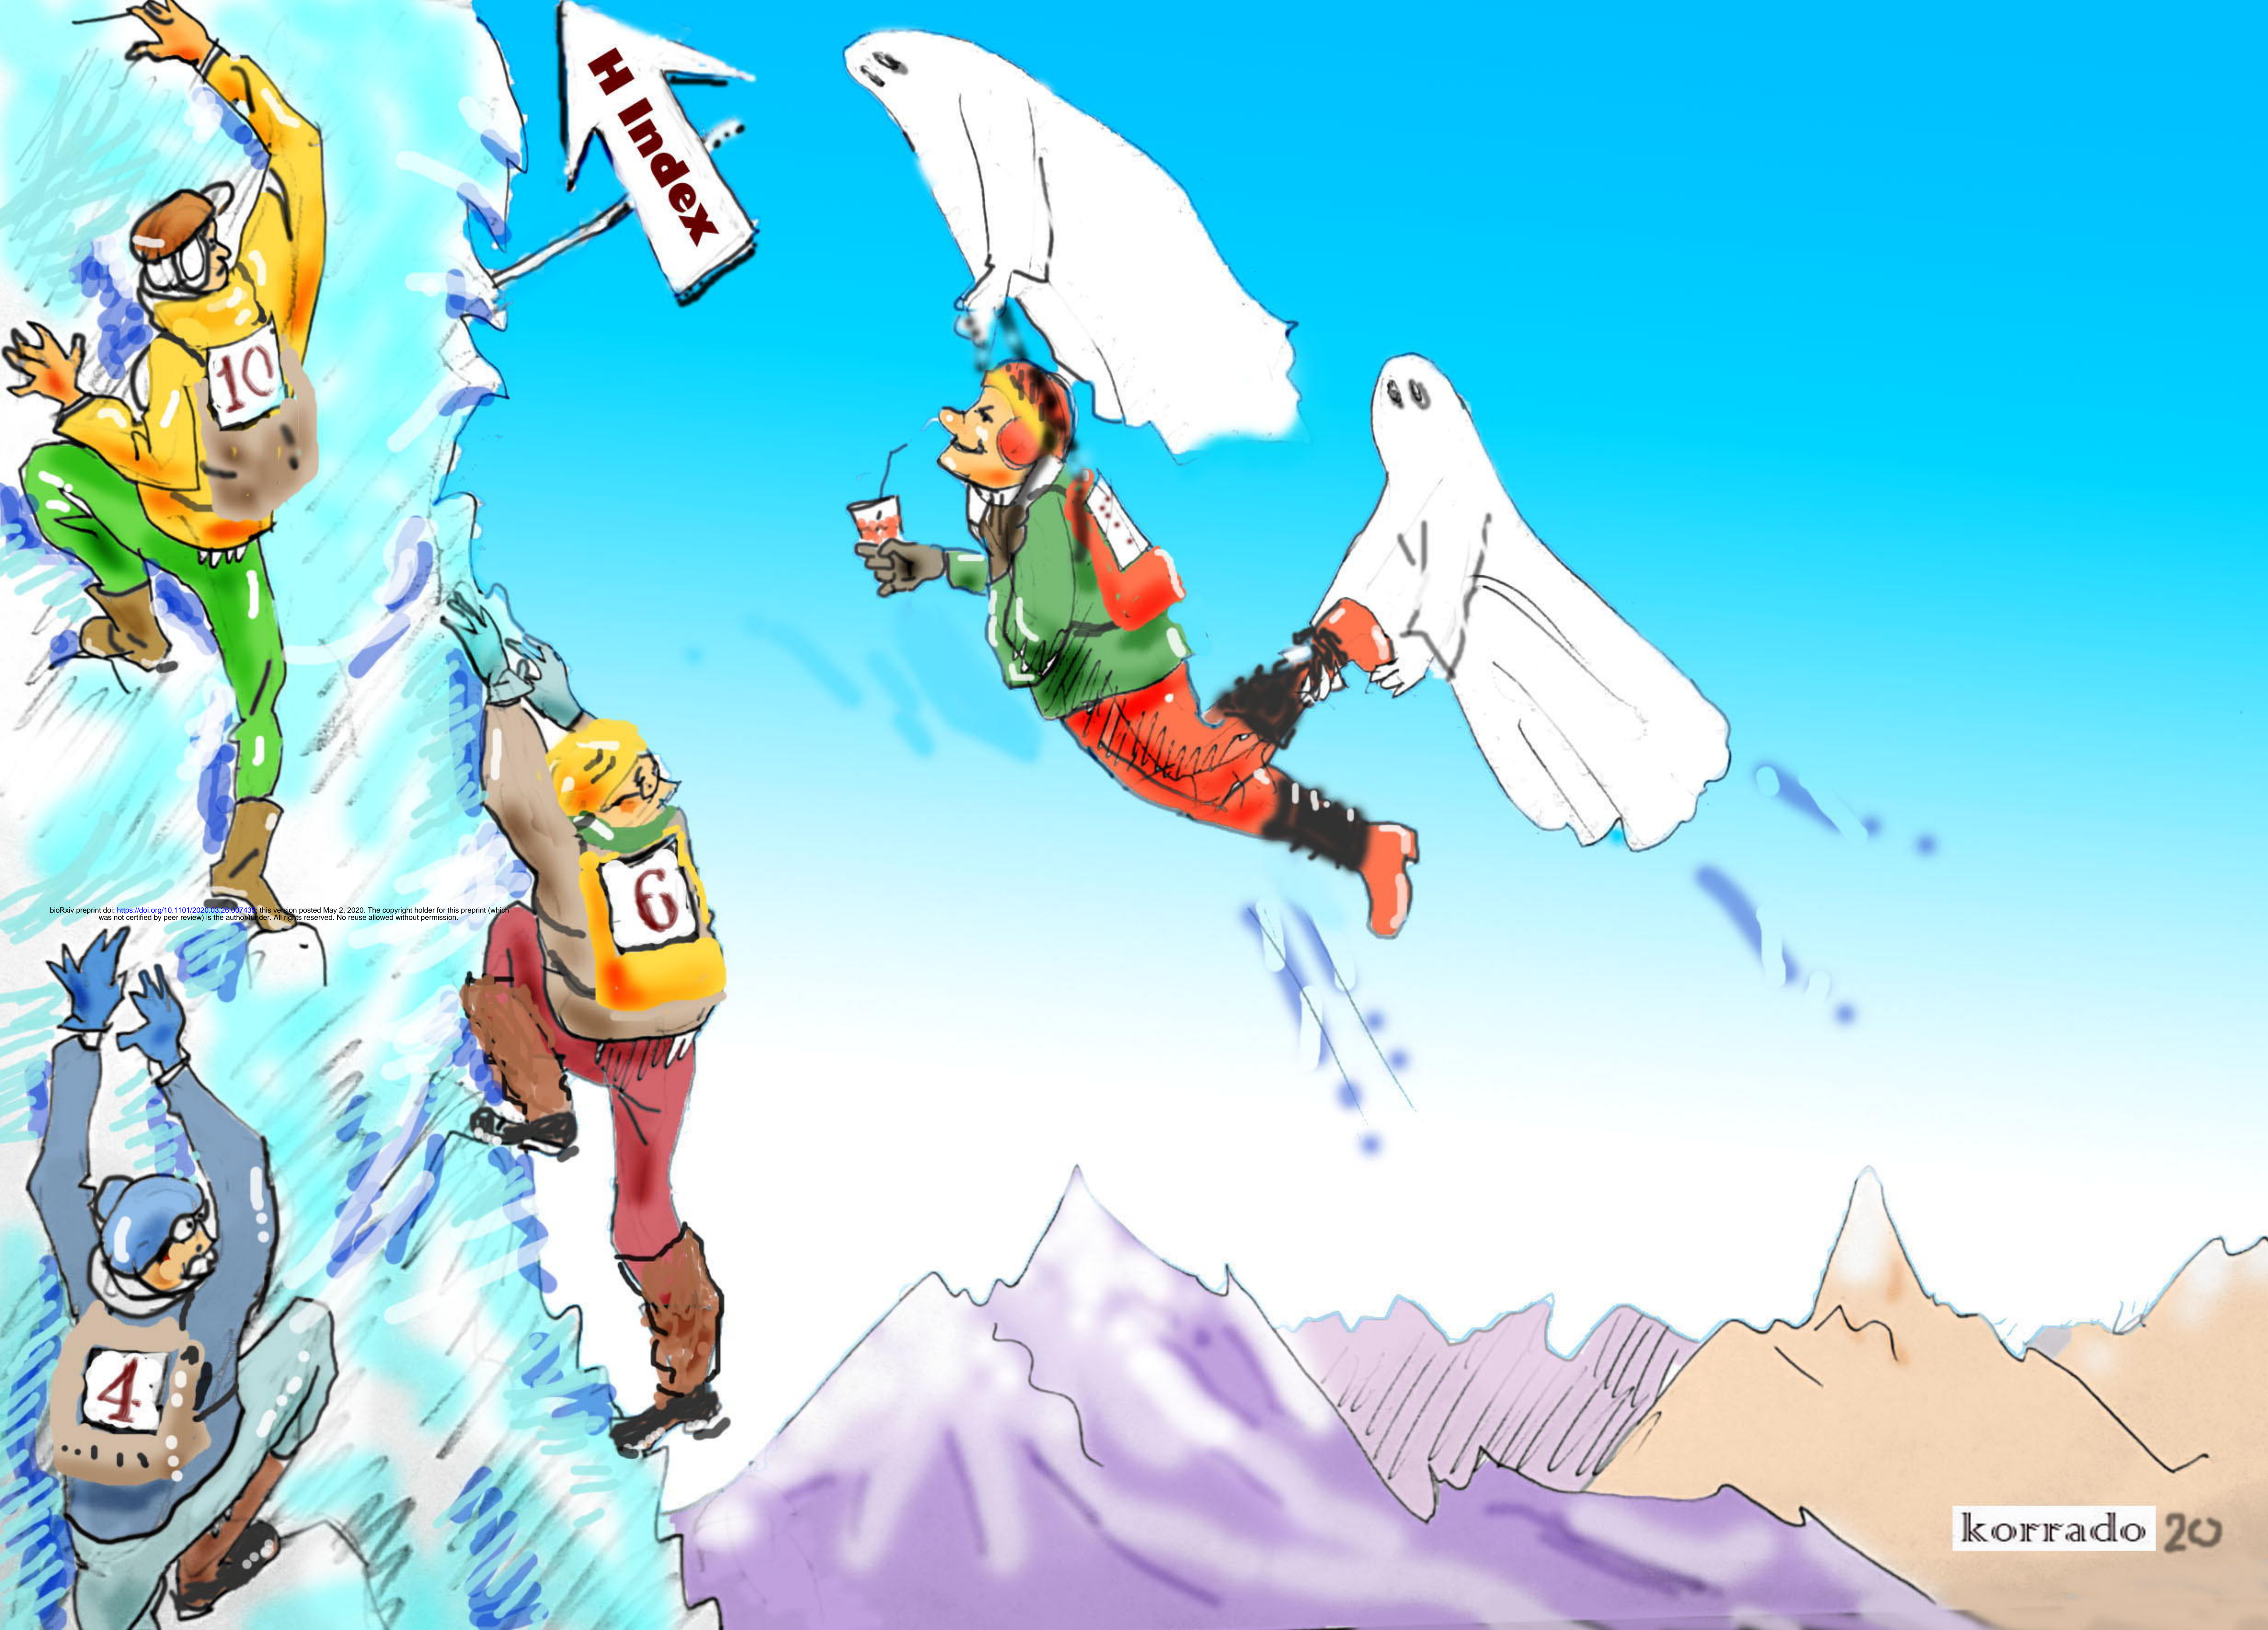

bioRxiv preprint doi: <https://doi.org/10.1101/2020.05.26.074333>; this version posted May 2, 2020. The copyright holder for this preprint (which was not certified by peer review) is the author/funder. All rights reserved. No reuse allowed without permission.
